# Supplementary material
Source: PubMed Central journal article supplement (PMC545534)
Supplement: pnas_102_3_826__1.pdf [file pnas_102_3_826__1.pdf]

**Table 3. Plasmid details**

|                                            |                                      |                                                                                              |                                            |                                     |
|--------------------------------------------|--------------------------------------|----------------------------------------------------------------------------------------------|--------------------------------------------|-------------------------------------|
| <i>pralF</i>                               | 1179ON2<br>1179C3                    | <b>GGAATTCGAGCTCAGACTAAAGGAGCAGATTATG</b><br><b>GCTCTAGATCAAACCTATCGAGGCCATTTTC</b>          | pMMB207                                    | <i>EcoRI XbaI</i>                   |
| pSB- <i>ralF</i> -M45                      | 1179ON2<br>1179OC                    | <b>GGAATTCGAGCTCAGACTAAAGGAGCAGATTATG</b><br><b>CATGCCATGGAAAATTTAATTGTCTACCTTTTTC</b>       | pSB616                                     | <i>EcoRI NcoI*</i>                  |
| <i>pralF</i> -M45                          | Subcloned from pSB- <i>ralF</i> -M45 |                                                                                              | pMMB207                                    | <i>EcoRI XbaI</i>                   |
| pM45- <i>ralF</i>                          | 1179ON<br>1179C3                     | <b>CGGGATCCTTATGCATCCAGAAATTGAAAAAG</b><br><b>GCTCTAGATCAAACCTATCGAGGCCATTTTC</b>            | pMMB207-<br>N45NT                          | <i>BamHI XbaI</i>                   |
| <i>pcya-ralF</i>                           | CyaNN<br>CyaNCNotI                   | <b>GAAGATCTTACAGCAATCGCATCAGGCTGG</b><br><b>CGGGATCCGCGGCCGCTGTCATAGCCGGAATCCTGG</b>         | pM45- <i>ralF</i>                          | <i>BglIII BamHI<sup>†,‡</sup></i>   |
| <i>pcya</i>                                | CyaNN<br>CyaNCfs                     | <b>GAAGATCTTACAGCAATCGCATCAGGCTGG</b><br><b>CGGGATCCCTGTCATAGCCGGAATCCTGG</b>                | pM45- <i>ralF</i>                          | <i>BglIII BamHI<sup>†,‡,§</sup></i> |
| <i>pralF</i> <sub>1-305</sub> - <i>cya</i> | ClaXbaCya<br>CyaPst                  | <b>GCATCGATTCTAGAATGCAGCAATCGCATCAGGC</b><br><b>GCGCTGCAGTTAGTCATAGCCGGAATCCTGGC</b>         | pM45- <i>ralF</i>                          | <i>ClaI PstI<sup>*,†</sup></i>      |
| <i>pralF-cya</i>                           | Seq1485<br>RalFXbaNew                | <b>GGACAAACCAAAGAGTCAATCG</b><br><b>GCTCTAGAAAATTTAATTGTCTACCTTTTTC</b>                      | <i>pralF</i> <sub>1-305</sub> - <i>cya</i> | <i>ClaI XbaI</i>                    |
| <i>pralF</i> <sub>1-194</sub>              | 1174ON2<br>S7-194r                   | <b>GGAATTCGAGCTCAGACTAAAGGAGCAGATTATG</b><br><b>CCGAGCTCTAGATTACAACCTCAAAGGTTTGGCTTTAATC</b> | pMMB207                                    | <i>EcoRI XbaI*</i>                  |
| <i>pcya-ralF</i> <sub>1-194</sub>          | 1179ON1<br>pMMB2073                  | <b>CGGGATCCTTATGCATCCAGAAATTGAAAAAG</b><br><b>CAGACCGCTTCTGCGTTCTG</b>                       | <i>pcya-ralF</i>                           | <i>BamHI PstI<sup>¶</sup></i>       |
| <i>pralF</i> <sub>1-339</sub>              | 1179ON2<br>ralF+340                  | <b>GGAATTCGAGCTCAGACTAAAGGAGCAGATTATG</b><br><b>GATCGTCTGACTTAGTTATCATATGCTTTTATTAAATC</b>   | pMMB207                                    | <i>EcoRI SalI</i>                   |
| <i>pcya-ralF</i> <sub>1-339</sub>          | 1179ON1<br>pMMB2073                  | <b>CGGGATCCTTATGCATCCAGAAATTGAAAAAG</b><br><b>CAGACCGCTTCTGCGTTCTG</b>                       | <i>pcya-ralF</i>                           | <i>BamHI PstI<sup>¶</sup></i>       |
|                                            | Seq1485                              | <b>GGACAAACCAAAGAGTCAATCG</b>                                                                | <i>pcya-ralF</i>                           | <i>ClaI PstI</i>                    |

|                                     |               |                                            |                  |                            |
|-------------------------------------|---------------|--------------------------------------------|------------------|----------------------------|
| <i>pcya-ralF</i> <sub>1-344</sub>   | and<br>345C   | GCGCTGCAGTTAAATGAGTTTTTTCTGGTTATC          |                  |                            |
| <i>pcya-ralF</i> <sub>1-349</sub>   | 350C          | GCGCTGCAGTTAGTTTCTCTCAATCGTAATGAG          |                  |                            |
| <i>pcya-ralF</i> <sub>1-354</sub>   | 355C          | GCGCTGCAGTTACTCCTTAAGTGCCAGGTTTC           |                  |                            |
| <i>pcya-ralF</i> <sub>1-359</sub>   | 360C          | GCGCTGCAGTTAATCTTTGGGAACGCCCTCC            |                  |                            |
| <i>pcya-ralF</i> <sub>1-364</sub>   | 365C          | GCGCTGCAGTTACATTTACAGCGTCTGGATCTTTG        |                  |                            |
| <i>pcya-ralF</i> <sub>1-369</sub>   | 370C          | GCGCTGCAGTTAACCTTTTTCTTTTTGCATTTTC         |                  |                            |
| <i>pcya-ralF</i> <sub>1-370</sub>   | 371C          | GCGCTGCAGTTATCTACCTTTTTCTTTTTGCATTTTC      |                  |                            |
| <i>pcya-ralF</i> <sub>1-371</sub>   | 372C          | GCGCTGCAGTTATTGTCTACCTTTTTCTTTTTG          |                  |                            |
| <i>pcya-ralF</i> <sub>1-372</sub>   | 373C          | GCGCTGCAGTTATAATTGTCTACCTTTTTCTTTTTG       |                  |                            |
| <i>pcya-ralF</i> <sub>1-373</sub>   | 374C          | GCGCTGCAGTTATTTTAATTGTCTACCTTTTTTC         |                  |                            |
| <i>pcya-ralF</i> <sub>16-374</sub>  | 16N           | CGGGATCCTTTTCAATGCCAAGCCAAAAAATG           | <i>pcya-ralF</i> | <i>Bam</i> HI <i>Pst</i> I |
| <i>pcya-ralF</i> <sub>222-374</sub> | 222N          | CGGGATCCTTTTCTTGCAATTCAACGGATGTAAAC        |                  |                            |
| <i>pcya-ralF</i> <sub>301-374</sub> | 301N          | CGGGATCCTTACCAAAGAGTCAATCGATTTG            |                  |                            |
| <i>pcya-ralF</i> <sub>340-374</sub> | 340N          | CGGGATCCTTCAGAAAAAATCATTACGATTG            |                  |                            |
| <i>pcya-ralF</i> <sub>345-374</sub> | 345N          | CGGGATCCTTACGATTGAGAGAAACCTGGC             |                  |                            |
| <i>pcya-ralF</i> <sub>350-374</sub> | 350N          | CGGGATCCTTCTGGCACTTAAGGAGGGCG              |                  |                            |
| <i>pcya-ralF</i> <sub>355-374</sub> | 355N          | CGGGATCCTTGGCGTTCCCAAAGATCCAGAC            |                  |                            |
| <i>pcya-ralF</i> <sub>360-374</sub> | 360N          | CGGGATCCTTCCAGACGCTGAAATGCAAAAAG           |                  |                            |
| <i>pcya-ralF</i> <sub>365-374</sub> | 365N          | CGGGATCCTTCAAAAAGAAAAAGGTAGAC              |                  |                            |
| <i>pcya-ralF</i> <sub>370-374</sub> | 370N          | CGGGATCCTTAGACAATTAATAATTTAATCC            |                  |                            |
|                                     | and<br>RalFC4 | GCGCTGCAGTCTAGACAAACTATCGAGGCCATTTC        |                  |                            |
|                                     | Seq1485       | GGACAAACCAAAGAGTCAATCG                     | <i>pcya-ralF</i> | <i>Cla</i> I <i>Pst</i> I  |
| <i>pcya-ralF</i> <sub>L372V</sub>   | and<br>372V   | GCGCTGCAGTTAAAATTTTACTTGTCTACCTTTTTCTTTTTG |                  |                            |

|                                   |                                 |                                                    |        |                                     |
|-----------------------------------|---------------------------------|----------------------------------------------------|--------|-------------------------------------|
| <i>pcya-ralF</i> <sub>L372F</sub> | 372F                            | <b>GCGCTGCAGTTAAAATTTAAATTGTCTACCTTTTTCTTTT</b> TG |        |                                     |
| <i>pcya-ralF</i> <sub>L372P</sub> | 372P                            | <b>GCGCTGCAGTTAAAATTTGGTTGTCTACCTTTTTCTTTT</b> TG  |        |                                     |
| <i>pcya-ralF</i> <sub>L372S</sub> | 372S                            | <b>GCGCTGCAGTTAAAATTTGATTGTCTACCTTTTTCTTTT</b> TG  |        |                                     |
| <i>pcya-ralF</i> <sub>L372T</sub> | 372T                            | <b>GCGCTGCAGTTAAAATTTGTTTGTCTACCTTTTTCTTTT</b> TG  |        |                                     |
| <i>pcya-ralF</i> <sub>L372A</sub> | 372A                            | <b>GCGCTGCAGTTAAAATTTGCTTGTCTACCTTTTTCTTTT</b> TG  |        |                                     |
| <i>pcya-ralF</i> <sub>K373E</sub> | 373E                            | <b>GCGCTGCAGTTAAAATTCTAATTGTCTACCTTTTTCTTTT</b> TG |        |                                     |
| <i>pcya-ralF</i> <sub>K373A</sub> | 373A                            | <b>GCGCTGCAGTTAAAATGCTAATTGTCTACCTTTTTCTTTT</b> TG |        |                                     |
| <i>pcya-ralF</i> <sub>K373R</sub> | 373R                            | <b>GCGCTGCAGTTAAAATCTTAATTGTCTACCTTTTTCTTTT</b> TG |        |                                     |
| pJV450- <i>cya-ralF</i>           | Subcloned from <i>pcya-ralF</i> |                                                    | pJV450 | <i>EcoRI SacI/PstI</i><br>(blunted) |

Forward primers are listed first followed by the reverse primer. Restriction enzyme sites used in plasmid construction are bold.

\*These plasmids represent intermediate products and were not used in the experiments described in the text.

†pMS107 was used as a PCR template.

‡PCR fragments were digested with *Bgl*III and *Bam*HI. The resulting fragments were ligated into *Bam*HI-digested pM45-*ralF*. The resulting plasmids in the right orientation have unique *Bam*HI sites at the junction of the *cya* and the *ralF* genes.

§*pcya* has a frameshift at the junction of the *cya* and the *ralF* genes. The resulting gene expresses a Cya protein with an 8-aa extension on the C terminus as shown in Fig. 1A.

¶*pralF*<sub>1-194</sub> and *pralF*<sub>1-339</sub> was used as a PCR template, respectively. The reverse primer (pMMB2073) anneals to DNA downstream of the cloning sites in these plasmids.
