# Supplementary material
Source: PubMed Central journal article supplement (PMC545534)

Sec7 domain

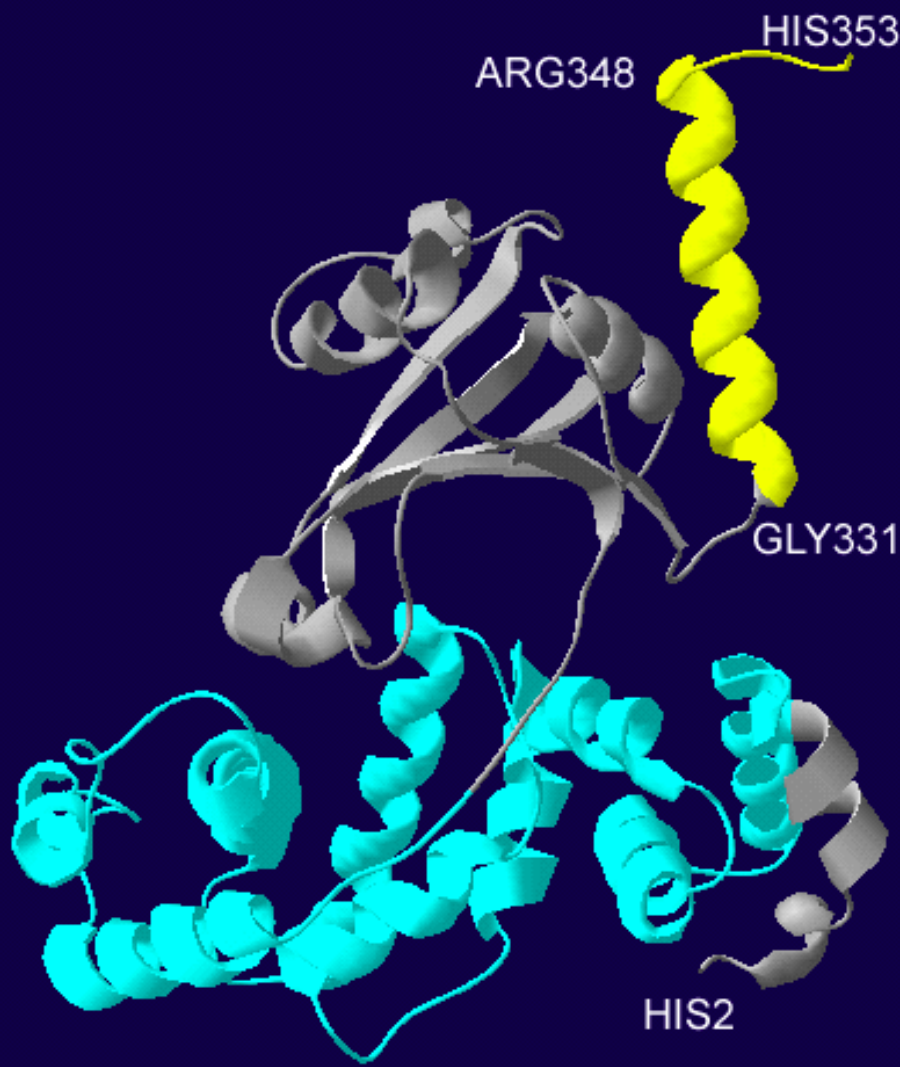

ARG348

HIS353

GLY331

HIS2

carboxy terminal helix

Supplement: pnas_102_3_826__2.pdf [file pnas_102_3_826__2.pdf]
